# Supplementary material for: Hollow-structured hematite particles derived from layered iron (hydro)oxyhydroxide–surfactant composites
Source: Royal Society of Chemistry journal article supplement (doi:10.1039/b305165j), 2003-01-01
Supplement: b305165j.doc [file b305165j.doc]

**Supplementary Information**


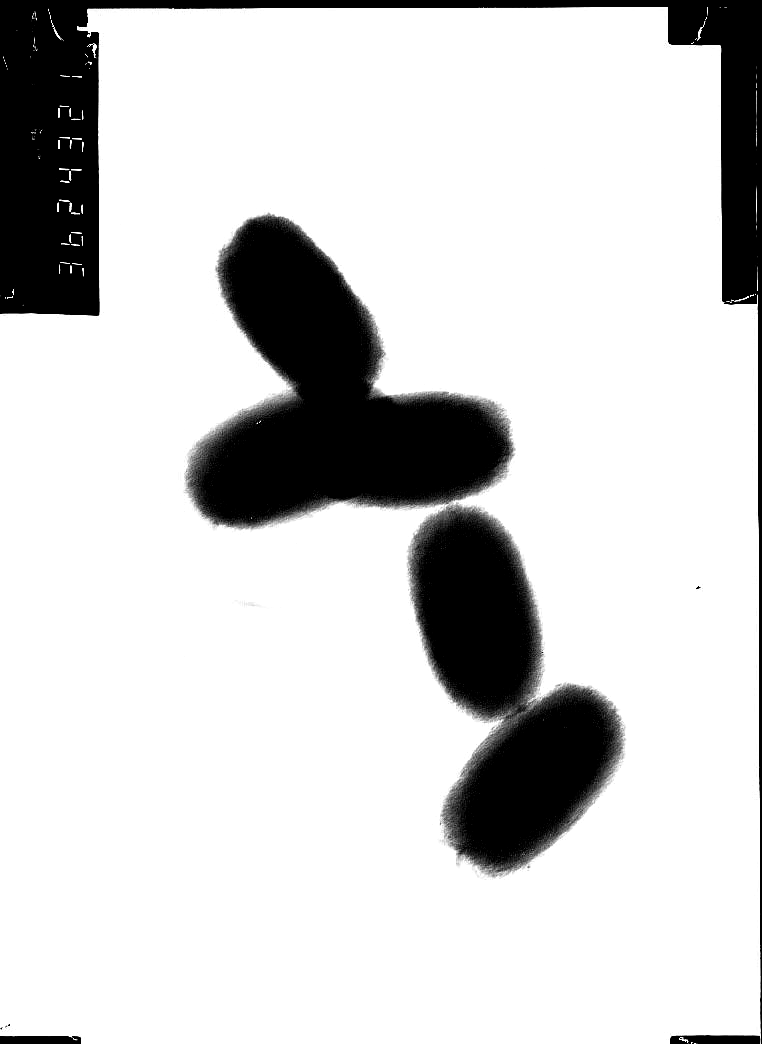

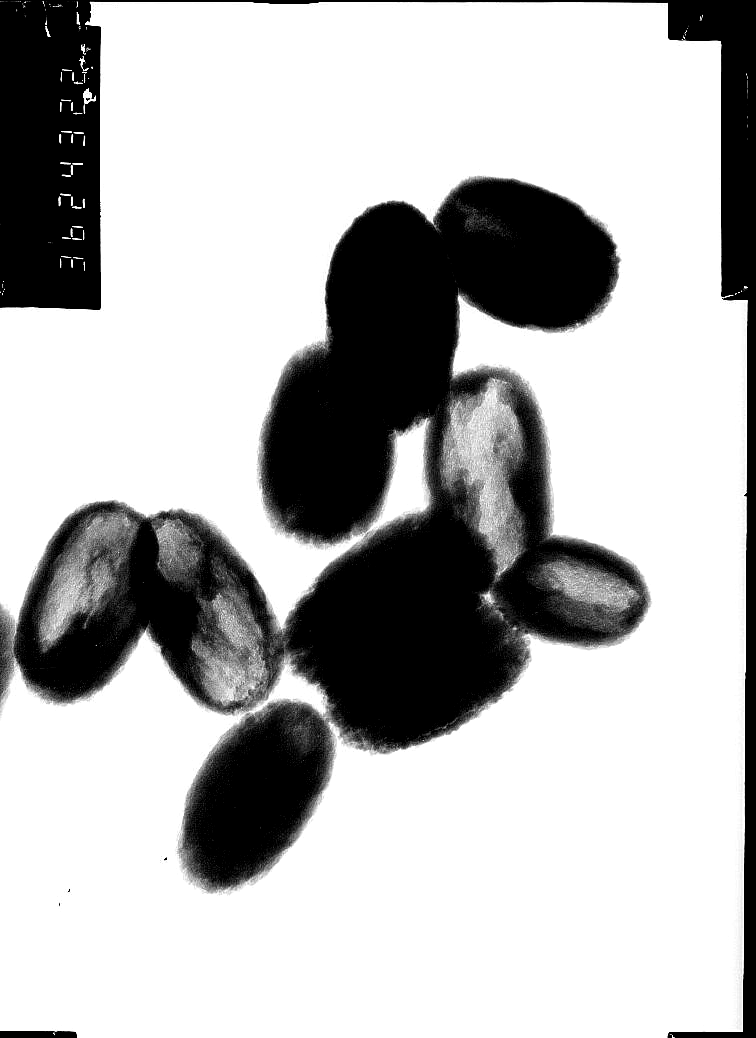

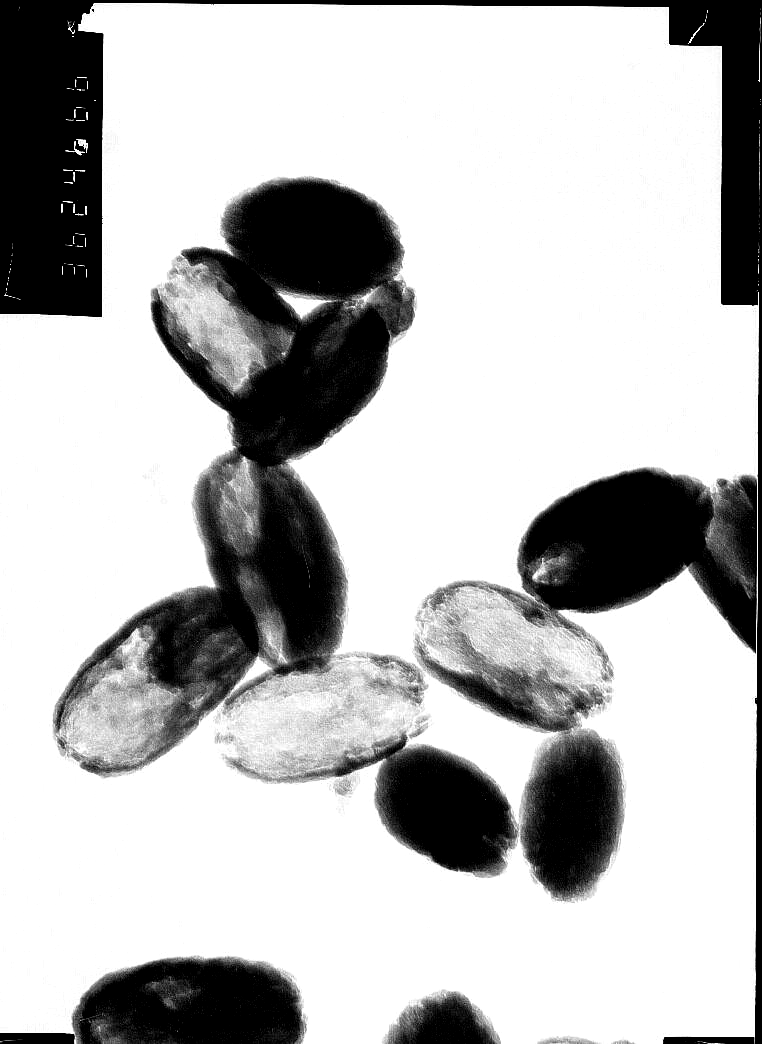

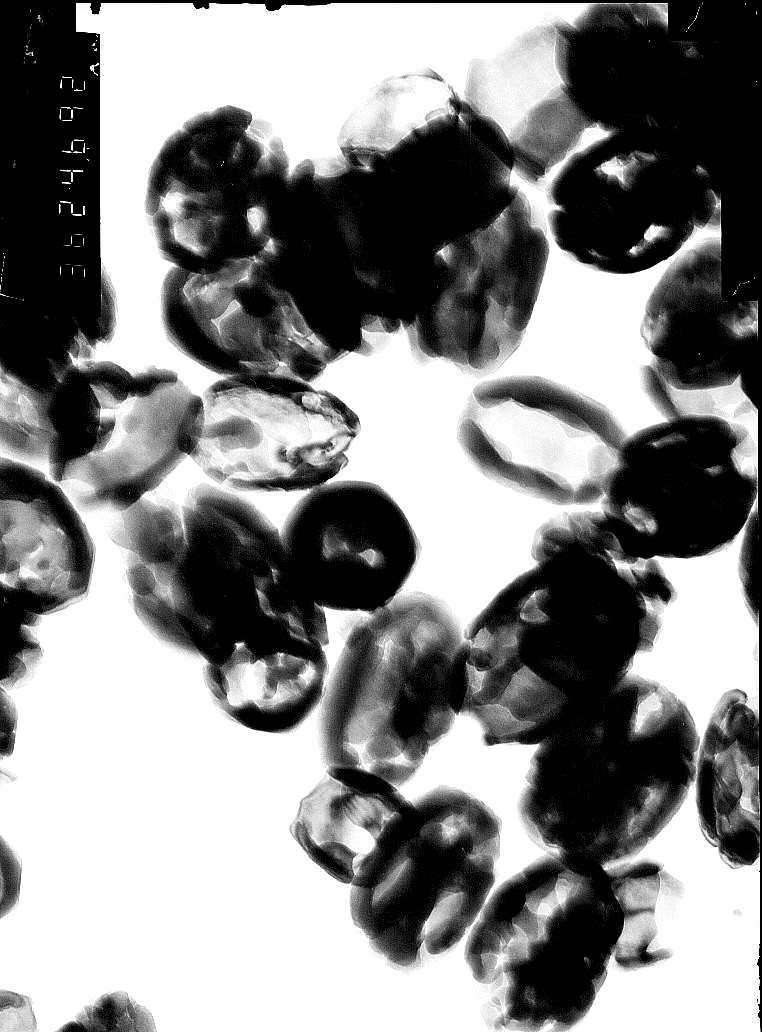


The images of the hollow structured hematite particles synthesized at 140℃ for 2h (a); 4h (b); 8h (c) and 24h (d). As shown in this figure, these HSHPs originate from the solid elliptical particles through a coupled dissolution and surface recrystallization process. The recrystallization process occurred on the surfaces of the elliptical particles and was supplied by dissolution of the amorphous core. Bar = 200nm
